# Supplementary material for: Agrobacterium delivers VirE2 protein into host cells via clathrin-mediated endocytosis
Source: PubMed Central journal article supplement — Sci Adv. 2017 Mar 22;3(3):e1601528. doi: 10.1126/sciadv.1601528 (PMC5362186; doi:10.1126/sciadv.1601528), 2017-03-22
Supplement: 1601528_SM.pdf [file 1601528_SM.pdf]

## Supplementary Materials for *Agrobacterium* delivers VirE2 protein into host cells via clathrin-mediated endocytosis

Xiaoyang Li and Shen Q. Pan

Published 22 March 2017, *Sci. Adv.* **3**, e1601528 (2017)

DOI: 10.1126/sciadv.1601528

### The PDF file includes:

- fig. S1. Time-course study of VirE2 subcellular localizations inside *N. benthamiana* cells.
- fig. S2. Accumulation of *Agrobacterium* at the intercellular space of infiltrated leaf epidermal cells.
- fig. S3. Accumulation of *Agrobacterium*-delivered VirE2 at the host plasma membrane.
- fig. S4. Colocalization of VirE2 with FM4-64-labeled endomembrane compartments in *N. benthamiana* epidermal cells.
- fig. S5. Expression of Hub impaired FM4-64 uptake in *N. benthamiana* epidermal cells.
- fig. S6. Expression of dominant-negative clathrin Hub impaired VirE2 departure from the plasma membrane in *N. benthamiana* epidermal cells.
- fig. S7. *Agrobacterium*-delivered VirE2 was associated with early endosomes rather than late endosomes.
- fig. S8. Mutations at other putative VirE2 endocytic sorting motifs did not affect VirE2 internalization in host cells.
- fig. S9. Sequence alignment analysis of VirE2 from different types of Ti plasmids.
- table S1. Strains and plasmids used in the studies.
- Legends for movies S1 and S2
- References (69–71)

**Other Supplementary Material for this manuscript includes the following:**  
(available at [advances.sciencemag.org/cgi/content/full/3/3/e1601528/DC1](http://advances.sciencemag.org/cgi/content/full/3/3/e1601528/DC1))

- movie S1 (.avi format). Comovement of VirE2 with FM4-64-labeled vesicles.
- movie S2 (.avi format). Restriction of VirE2 trafficking in ES1-induced aggregation of SYP61-containing endosomes.

## Supplementary Materials

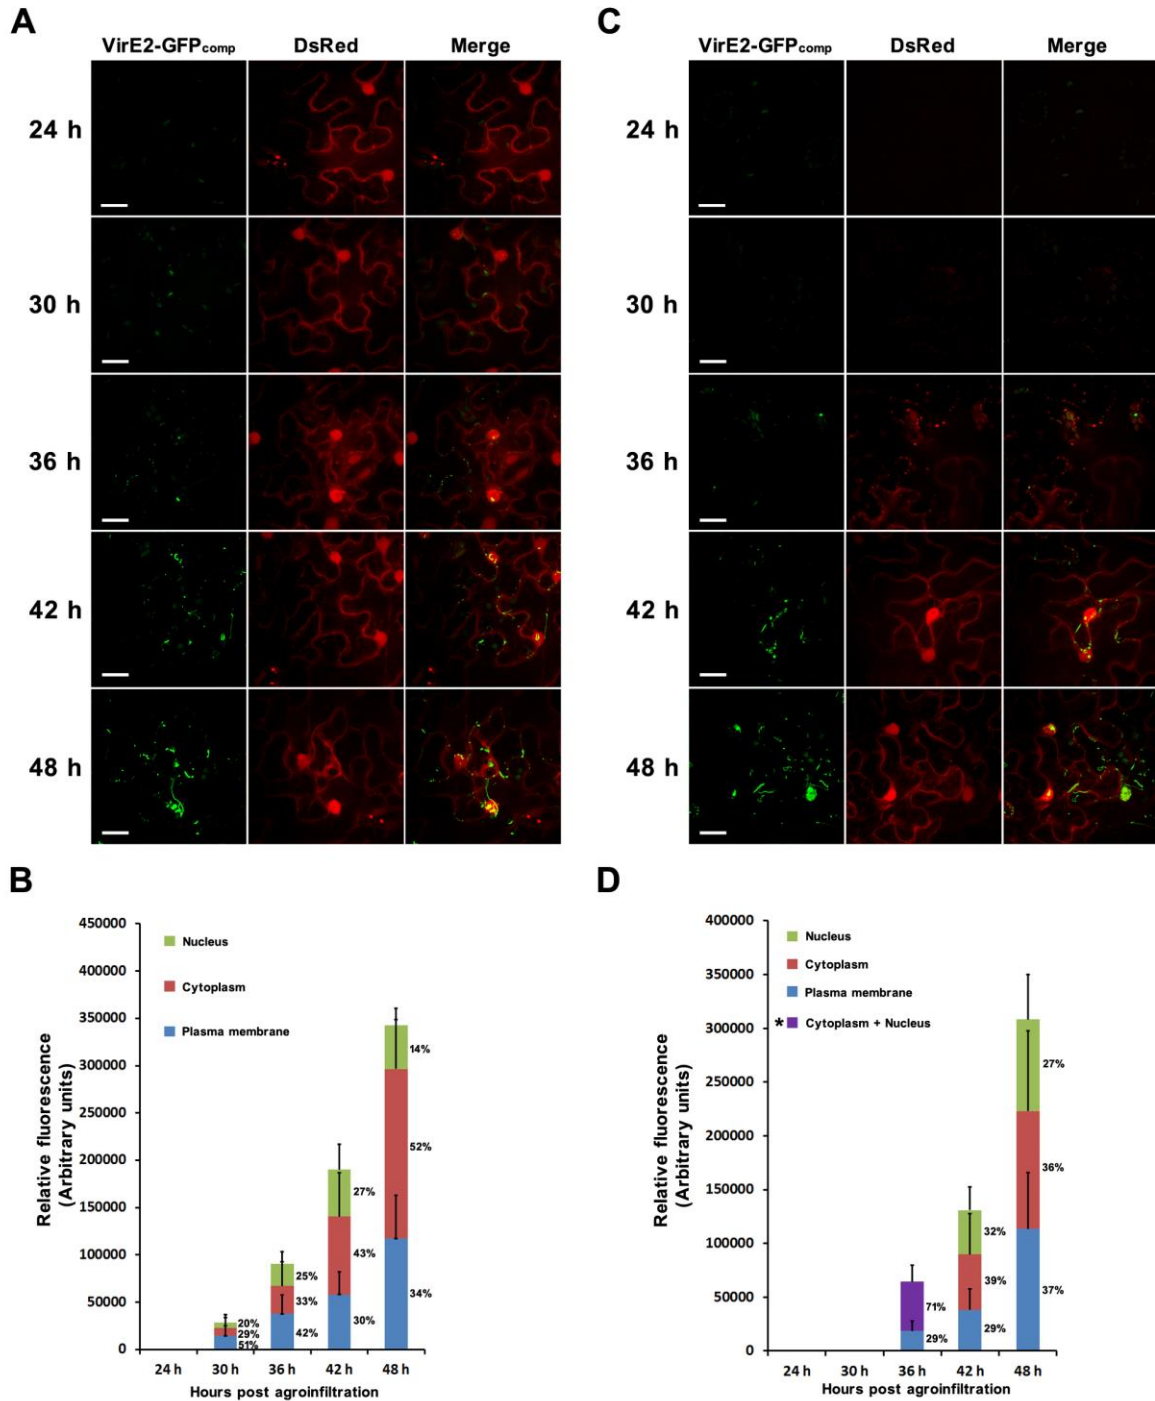

**fig. S1. Time-course study of VirE2 subcellular localizations inside *N. benthamiana* cells.**

(A) *A. tumefaciens* EHA105*virE2::GFP11* was infiltrated into transgenic *N. benthamiana* (Nb308A) leaves expressing both GFP1-10 and DsRed. Projected Z-series images were obtained at different time points post agroinfiltration. (B) Quantification of VirE2 subcellular localizations for panel A. The

intensity of VirE2-GFP<sub>comp</sub> signals associated with the plasma membrane, cytoplasm and nucleus was measured (n=30). **(C)** Wild type *N. benthamiana* leaves were infiltrated with evenly mixed *A. tumefaciens* strains EHA105virE2::*GFP11*(pGFP1-10), which is capable of delivering VirE2-GFP11 and the T-DNA expressing GFP1-10, and EHA105virE2::*GFP11*(pQH121-mC), which is capable of delivering VirE2-GFP11 and the T-DNA expressing free mCherry. Projected Z-series images were obtained at different time points after agroinfiltration. **(D)** Quantification of VirE2 subcellular localizations for panel C. The intensity of VirE2-GFP<sub>comp</sub> signals associated with the plasma membrane, cytoplasm and nucleus was measured (n=20). Scale bars, 20 μm. \* Signals in the cytoplasm and nucleus were combined for calculation, as the transient expression of mCherry from the T-DNA delivered into the wild type *N. benthamiana* leaves at 36 hours after agroinfiltration was insufficient to show the nucleus.

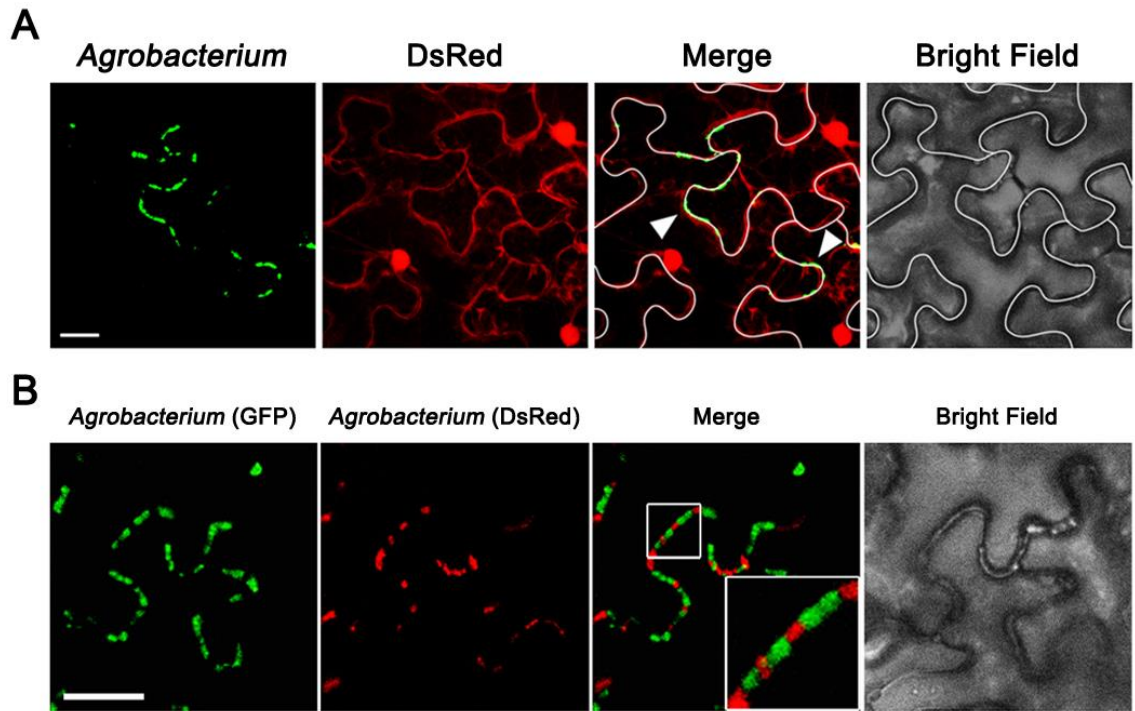

**fig. S2. Accumulation of *Agrobacterium* at the intercellular space of infiltrated leaf epidermal cells.**

(A) Projected Z-series images of *N. benthamiana* (Nb308A) leaves infiltrated with GFP-labeled *A. tumefaciens* cells EHA105 (pVB-GFP). Images were obtained 2 days after agroinfiltration under confocal microscopy with an Olympus UAPO N 340 40× NA 1.15 water immersion objective. White lines were added to the images to indicate borders between leaf epidermal cells. (B) Projected Z-series image of wild type

*N. benthamiana* leaves infiltrated with evenly mixed GFP labeled *A. tumefaciens* cells EHA105 (pVB-GFP) and DsRed labeled *A. tumefaciens* cells EHA105 (pVB-RFP). Scale bars, 20 μm.

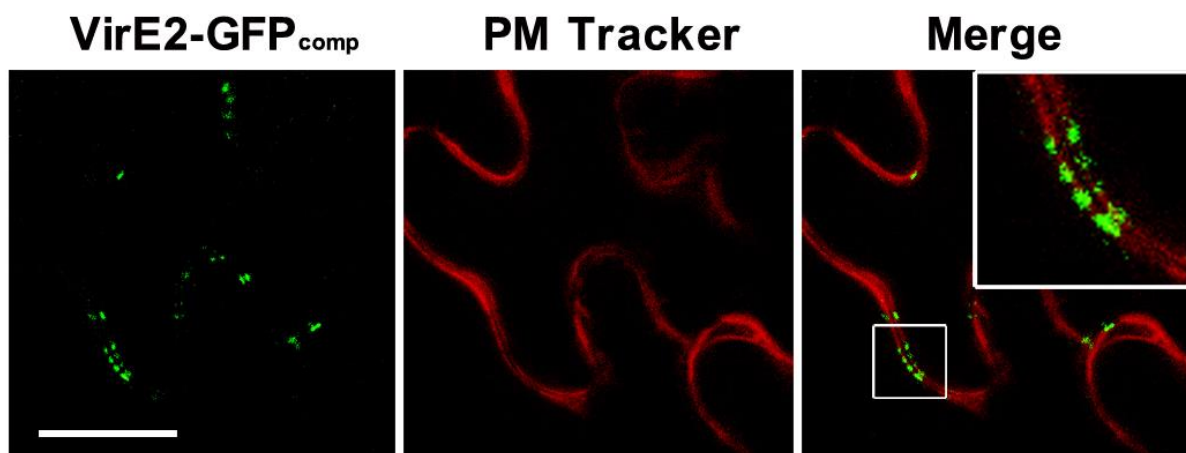

**fig. S3. Accumulation of *Agrobacterium*-delivered VirE2 at the host plasma membrane.**

Wild type *N. benthamiana* leaves were infiltrated with evenly mixed *A. tumefaciens* strains EHA105*virE2::GFP11*(pGFP1-10), which is capable of delivering VirE2-GFP11 and the T-DNA expressing GFP1-10, and EHA105*virE2::GFP11*(pm-rb), which is capable of delivering VirE2-GFP11 and the T-DNA expressing a plasma membrane (PM) tracker. Images were obtained 2 days after agroinfiltration under confocal microscopy with an Olympus UPlan SAPO 100× NA 1.4 oil immersion objective. Scale bars, 20 μm.

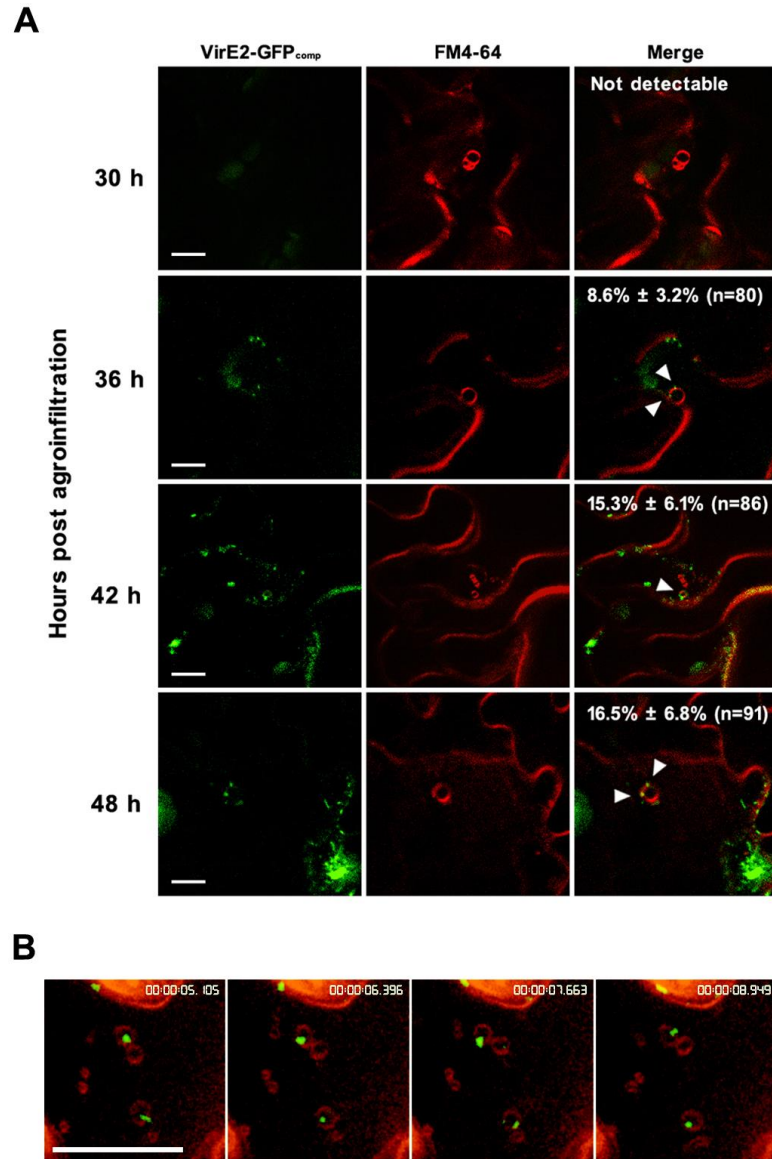

**fig. S4. Colocalization of VirE2 with FM4-64–labeled endomembrane compartments in *N. benthamiana* epidermal cells.** (A) Time course of VirE2 colocalization with endomembrane compartments. Wild type *N. benthamiana* leaves were infiltrated with *A. tumefaciens* cells EHA105*virE2::GFP11*(pGFP1-10). Confocal microscopy with single optical sections was conducted at different time points post agroinfiltration. One hour before the confocal microscopy, the cells were stained with FM4-64. Percentages of detected FM4-64-stained endomembrane compartments colocalized with VirE2 are shown in the merge panels. Scale bar, 10  $\mu$ m. (B) Time course of VirE2 comovement with endomembrane compartments. Wild type *N. benthamiana* leaves were infiltrated with *A. tumefaciens* cells EHA105*virE2::GFP11*(pGFP1-10) and stained with FM4-64. The images were obtained 2 days after agroinfiltration (1 hour after FM4-64 staining). Scale bar, 20  $\mu$ m.

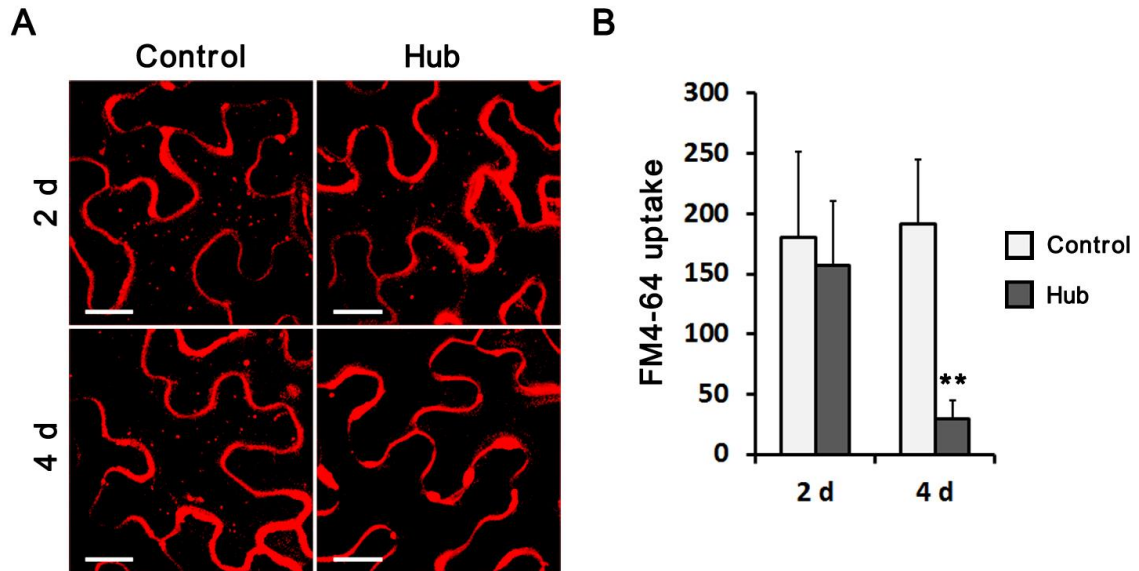

**fig. S5. Expression of Hub impaired FM4-64 uptake in *N. benthamiana* epidermal cells.** (A) Wild type *N. benthamiana* leaves were infiltrated with *A. tumefaciens* cells EHA105(pXY01) or EHA105(pXY01-Hub) followed by FM4-64 staining at 2 days or 4 days after agroinfiltration. Projected Z-series images were obtained 5 hours post staining under confocal microscopy with an Olympus UAPO N 340 40× NA 1.15 water immersion objective. Scale bars, 20  $\mu$ m. (B) Quantification of FM4-64 uptake. The number of endomembrane compartments stained by FM4-64 was calculated in each image (n=20). \*\* $p < 0.01$  (unpaired Student's *t* test).



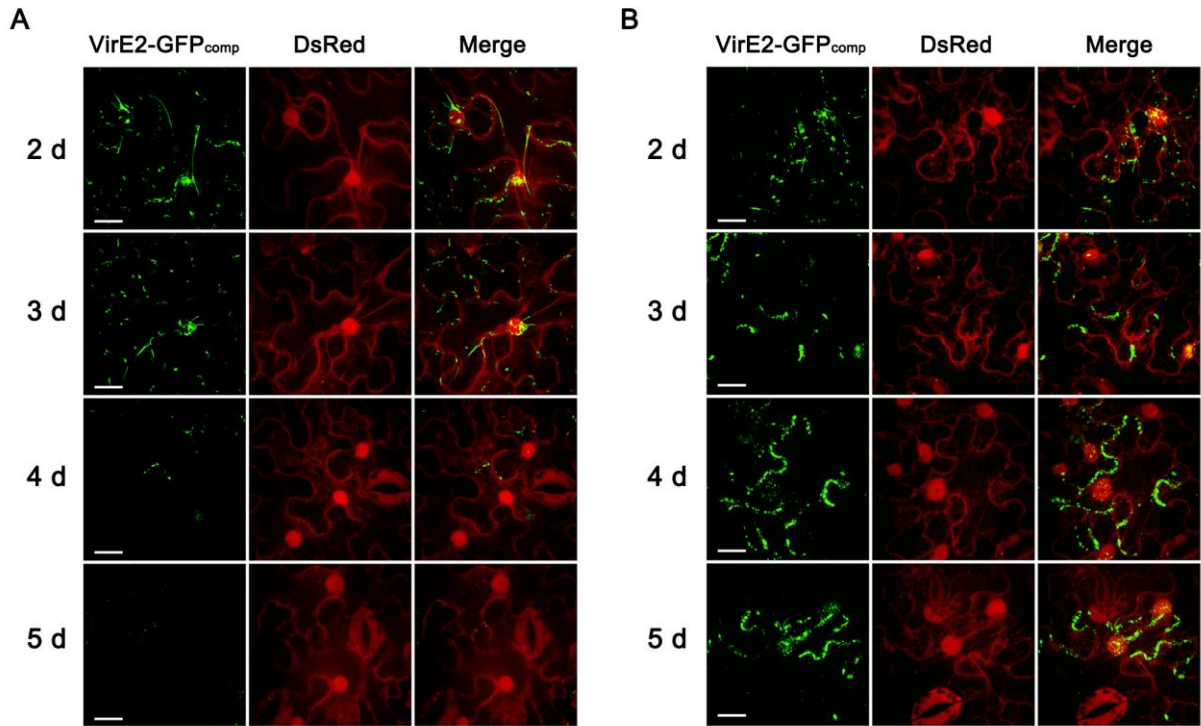

**fig. S6. Expression of dominant-negative clathrin Hub impaired VirE2 departure from the plasma membrane in *N. benthamiana* epidermal cells.** (A) Wild type *N. benthamiana* leaves were infiltrated with *A. tumefaciens* cells EHA105virE2::GFP11(pXY01). (B) Wild type *N. benthamiana* leaves were infiltrated with *A. tumefaciens* cells EHA105virE2::GFP11(pXY01-Hub). Projected Z-series images are shown. Scale bars, 20  $\mu\text{m}$ .

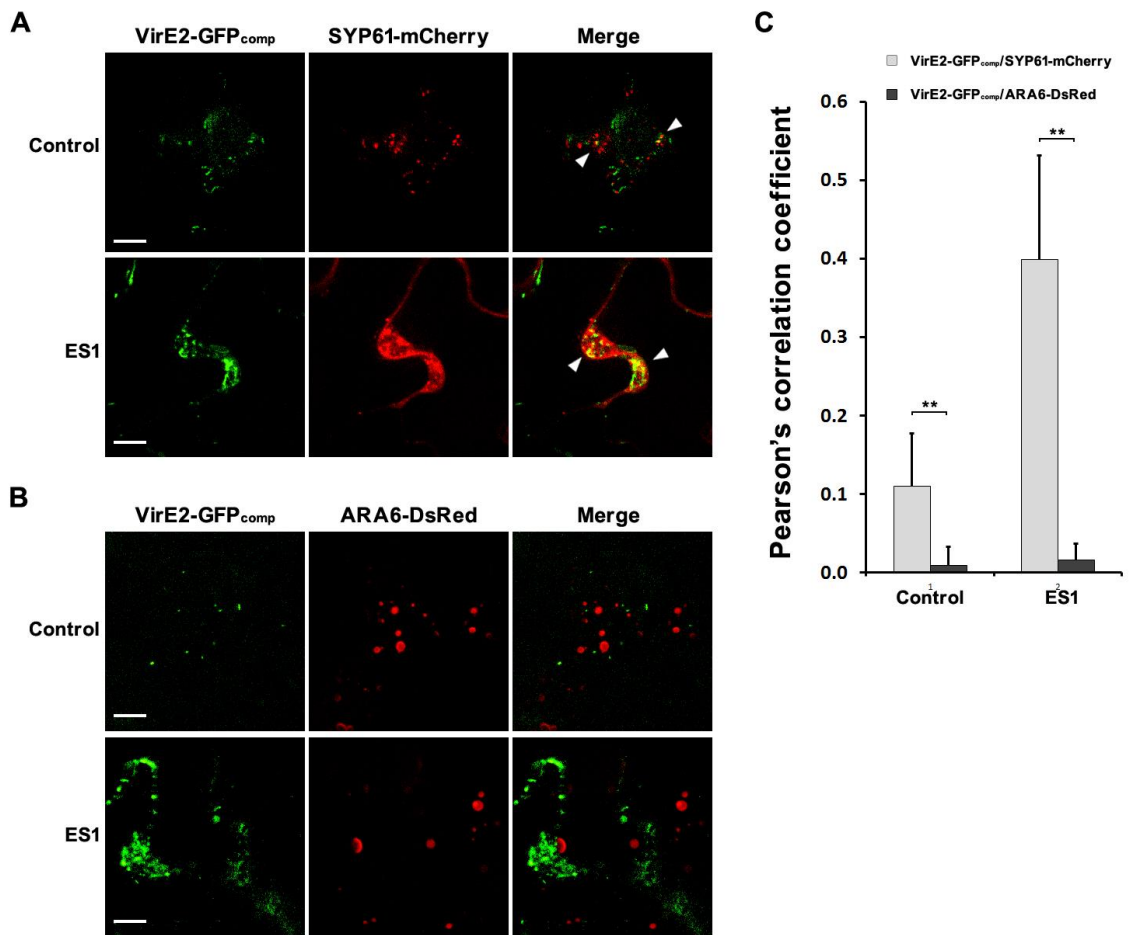

**fig. S7. *Agrobacterium*-delivered VirE2 was associated with early endosomes rather than late endosomes.** (A) *Agrobacterium*-delivered VirE2 was associated with early endosomes labeled with SYP61-mCherry. Wild type *N. benthamiana* leaves were infiltrated with evenly mixed *A. tumefaciens* cells EHA105*virE2::GFP11*(pGFP1-10) and EHA105*virE2::GFP11*(pXY01-SYP61-mC) together with (lower panel) or without (upper panel) chemical effector ES1. Single optical sections were obtained 2 days after agroinfiltration. (B) *Agrobacterium*-delivered VirE2 was not associated with late endosomes labeled with ARA6-DsRed. Wild type *N. benthamiana* leaves were infiltrated with evenly mixed *A. tumefaciens* cells EHA105*virE2::GFP11*(pGFP1-10) and EHA105*virE2::GFP11*(pXY01-ARA6-DsRed) together with (lower panel) or without (upper panel) chemical effector ES1. Single optical sections were obtained 2 days after agroinfiltration. (C) Estimation of the colocalization through Pearson's correlation coefficient using ImageJ plugin "Coloc 2" (n=30). \*\* $p < 0.01$  (unpaired Student's t test). Scale bars, 10 $\mu$ m .

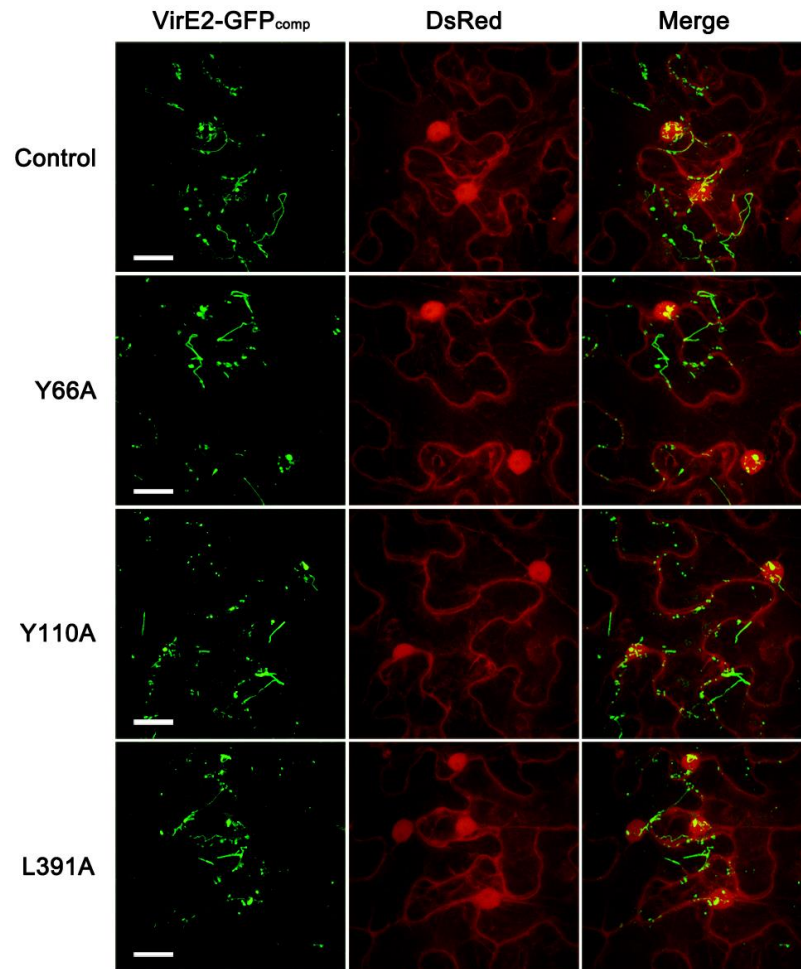

**fig. S8. Mutations at other putative VirE2 endocytic sorting motifs did not affect VirE2 internalization in host cells.** *N. benthamiana* (Nb308A) leaves were infiltrated with *A. tumefaciens* EHA105*virE2::GFP11* or VirE2 mutants, in which the corresponding tyrosine residues or leucine residues were substituted with alanine. Projected Z-series images were obtained at 2 days after agroinfiltration. Scale bars, 20  $\mu$ m.

|                     |            |                                |            |
|---------------------|------------|--------------------------------|------------|
| <b>Leucinopine:</b> | <b>478</b> | RNENGQRTGTYTSVAEYERLQLRLPPDAAG | <b>507</b> |
| <b>Nopaline:</b>    | <b>485</b> | RNEKGQRTGTYTNVVEYERLMMKLPSDAAQ | <b>514</b> |
| <b>Octopine:</b>    | <b>462</b> | RNENGQRTGTYTSVAEYERLQLRLPADAAG | <b>491</b> |

**fig. S9. Sequence alignment analysis of VirE2 from different types of Ti plasmids.** Sequence alignment revealed that the dual tyrosine-based endocytic motifs at the C-terminus were conserved on VirE2 proteins from different types of Ti plasmids.

**table S1. Strains and plasmids used in the studies.**

| Strain and plasmid                      | Relevant characteristics                                                                               | Source or reference |
|-----------------------------------------|--------------------------------------------------------------------------------------------------------|---------------------|
| <i>A. tumefaciens</i>                   |                                                                                                        |                     |
| EHA105                                  | C58 strain containing pTiBo542 without T-DNA                                                           | (69)                |
| EHA105 <i>virE2::GFP11</i>              | EHA105 derivative, with the GFP11 coding sequence inserted into <i>virE2</i> on pTiBo542               | (37)                |
| EHA105 <i>virE2(Y488A)::GFP11</i>       | EHA105 <i>virE2::GFP11</i> derivative, with a point mutation Y488A at <i>virE2</i>                     | This study          |
| EHA105 <i>virE2(Y494A)::GFP11</i>       | EHA105 <i>virE2::GFP11</i> derivative, with a point mutation Y494A at <i>virE2</i>                     | This study          |
| EHA105 <i>virE2(Y488A Y494A)::GFP11</i> | EHA105 <i>virE2::GFP11</i> derivative, with point mutations Y488A and Y494A at <i>virE2</i>            | This study          |
| A348                                    | A136 (pTiA6NC) (Octopine-type)                                                                         | (70)                |
| A348- <i>virE2(Y472A)</i>               | A348 derivative, with a point mutation Y472A at <i>virE2</i>                                           | This study          |
| A348- <i>virE2(Y478A)</i>               | A348 derivative, with a point mutation Y478A at <i>virE2</i>                                           | This study          |
| A348- <i>virE2(Y472A Y478A)</i>         | A348 derivative, with point mutations Y472A and Y478A at <i>virE2</i>                                  | This study          |
| Plasmids                                |                                                                                                        |                     |
| pm-rb                                   | A binary vector containing a plant plasma membrane marker; Km <sup>r</sup>                             | (39)                |
| er-gb                                   | A binary vector containing a plant ER marker; Km <sup>r</sup>                                          | (39)                |
| pXY01                                   | A binary vector for target gene expression under the control of CaMV 35S promoter; Km <sup>r</sup>     | This study          |
| pGFP1-10                                | pXY01 derivative, with GFP1-10 coding sequence under the control of CaMV 35S promoter; Km <sup>r</sup> | This study          |
| pXY01-Hub                               | pXY01 derivative, with Hub coding sequence under the control of CaMV 35S promoter; Km <sup>r</sup>     | This study          |

|                    |                                                                                                                     |                     |
|--------------------|---------------------------------------------------------------------------------------------------------------------|---------------------|
| pXY01-SYP61-mC     | pXY01 derivative, with SYP61-mCherry coding sequence under the control of CaMV 35S promoter; Km <sup>r</sup>        | This study          |
| pXY01-ARA6-DsRed   | pXY01 derivative, with ARA6-DsRed coding sequence under the control of CaMV 35S promoter; Km <sup>r</sup>           | This study          |
| pCB301             | A mini binary vector; Km <sup>r</sup>                                                                               | (68)                |
| pXY301             | pCB301 derivative, with T-DNA right border sequence deleted; Km <sup>r</sup>                                        | This study          |
| pVB                | pXY301 derivative, with a VirB promoter region; Km <sup>r</sup>                                                     | This study          |
| pVB-RFP            | pVB derivative, with DsRed coding sequence under the control of VirB promoter; Km <sup>r</sup>                      | This study          |
| pVBA-RFP           | pVB-RFP derivative, with kanamycin resistance cassette replaced by ampicillin resistance cassette; Amp <sup>r</sup> | This study          |
| pVB-GFP            | pVB derivative, with GFP coding sequence under the control of VirB promoter; Km <sup>r</sup>                        | This study          |
| pBI121             | A binary vector; Km <sup>r</sup>                                                                                    | (71)                |
| pQH121             | pBI121 derivative, with <i>gusA</i> deleted; Km <sup>r</sup>                                                        | This study          |
| pQH121-mC          | pQH121 derivative, with mCherry coding sequence under the control of CaMV 35S promoter; Km <sup>r</sup>             | This study          |
| pMAL-c2x           | MBP tag expression vector; Amp <sup>r</sup>                                                                         | New England Biolabs |
| pMBP-AP2MC         | pMAL-c2x derivative, expressing MBP-AP2MC fusion protein; Amp <sup>r</sup>                                          | This study          |
| pGEX-4T-1          | GST tag expression vector; Amp <sup>r</sup>                                                                         | GE Healthcare       |
| pGST-VirE2C        | pGEX-4T-1 derivative, expressing MBP-VirE2C fusion protein; Amp <sup>r</sup>                                        | This study          |
| pGST-VirE2C(Y488A) | pGEX-4T-1 derivative, expressing MBP-VirE2C(Y488A) fusion protein; Amp <sup>r</sup>                                 | This study          |
| pGST-VirE2C(Y494A) | pGEX-4T-1 derivative, expressing MBP-VirE2C(Y494A) fusion protein; Amp <sup>r</sup>                                 | This study          |

|                          |                                                                                            |            |
|--------------------------|--------------------------------------------------------------------------------------------|------------|
| pGST-VirE2C(Y488A/Y494A) | pGEX-4T-1 derivative, expressing MBP-VirE2C(Y488A /Y494A) fusion protein; Amp <sup>r</sup> | This study |
|--------------------------|--------------------------------------------------------------------------------------------|------------|

**movie S1. Comovement of VirE2 with FM4-64-labeled vesicles.**

*A. tumefaciens* strain EHA105*virE2::GFP11*(pGFP1-10) was infiltrated into wild type *N. benthamiana* leaves. FM4-64 staining was carried out 2 days after agroinfiltration. The epidermal cells were examined at 1 hour after FM4-64 staining. Scale bar, 20  $\mu$ m. Time (h:min:s) is shown at the top right.

**movie S2. Restriction of VirE2 trafficking in ES1-induced aggregation of SYP61-containing endosomes.**

*A. tumefaciens* cells EHA105*virE2::GFP11*(pGFP1-10) and EHA105*virE2::GFP11*(pXY01-SYP61-mC) were mixed with ES1 (25  $\mu$ M) and infiltrated into wild type *N. benthamiana* leaves. The epidermal cells were examined at 2 days after agroinfiltration. Scale bar, 20  $\mu$ m. Time (h:min:s) is shown at the top right.
